# Supplementary material for: Gene Conversion Explains Elevated Diversity in the Immunity Modulating APL1 Gene of the Malaria Vector Anopheles funestus
Source: MDPI journal article supplement (doi:10.3390/genes13061102), 2022-06-20
Supplement: s1 [file s1]

# a) AFUN006610

Tajima's D = -0.98

P-value = 0.34

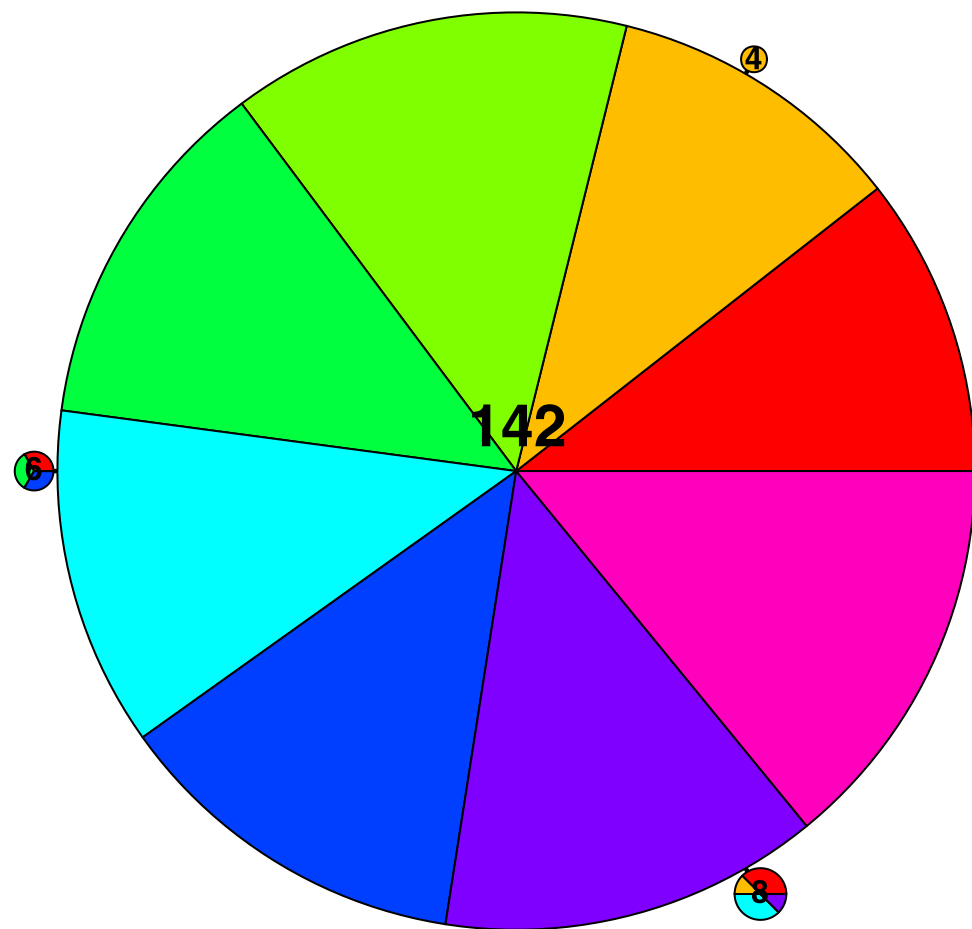

# b) AFUN006611

Tajima's D = 0.76

P-value = 0.44

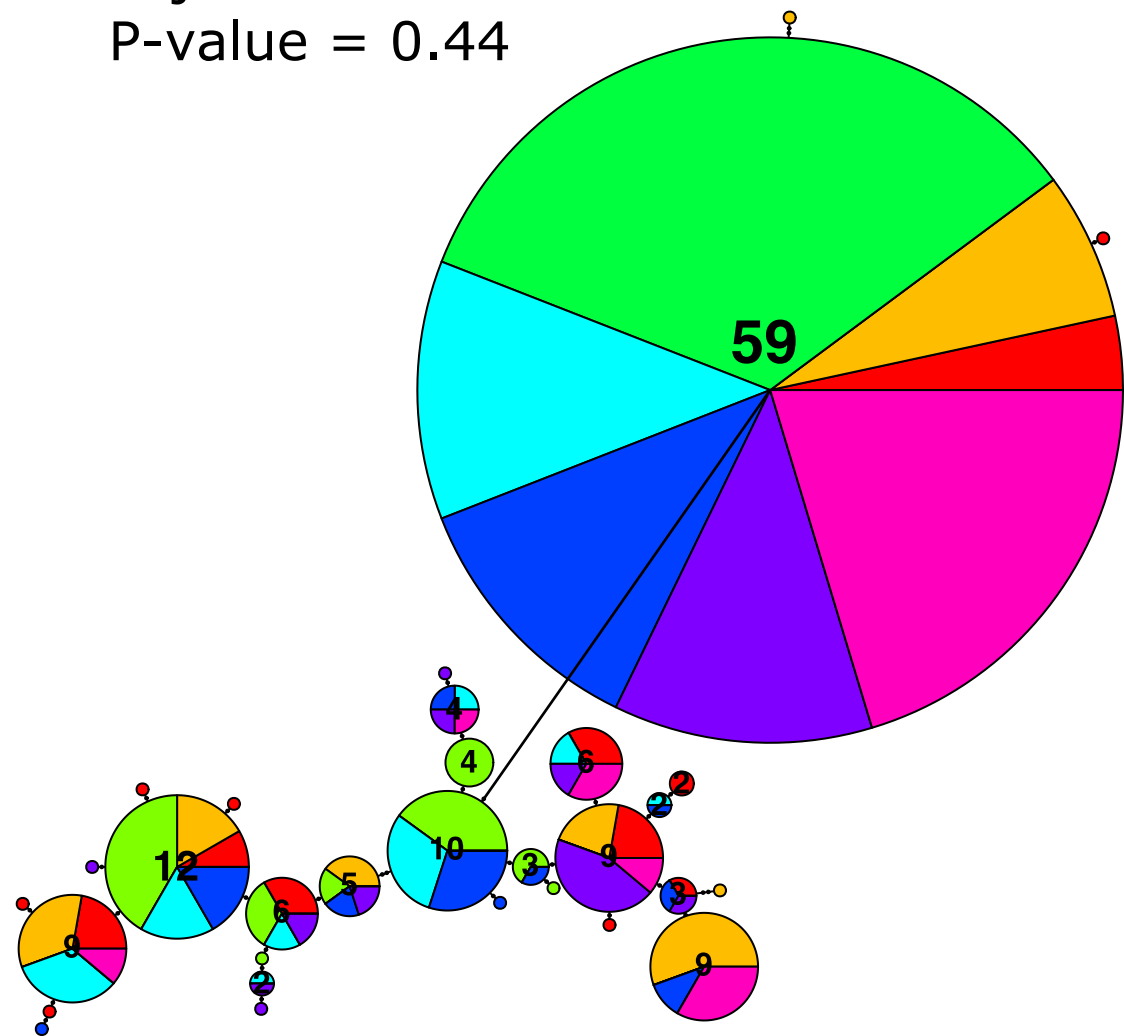

- Cameroon-R
- Cameroon-S
- FANG
- FUMOZ
- Malawi-R
- Malawi-S
- Uganda-R
- Uganda-S
