# Supplementary figures and images for: Gene Conversion Explains Elevated Diversity in the Immunity Modulating APL1 Gene of the Malaria Vector Anopheles funestus
Source: MDPI journal article supplement (doi:10.3390/genes13061102), 2022-06-20

AFUN018581

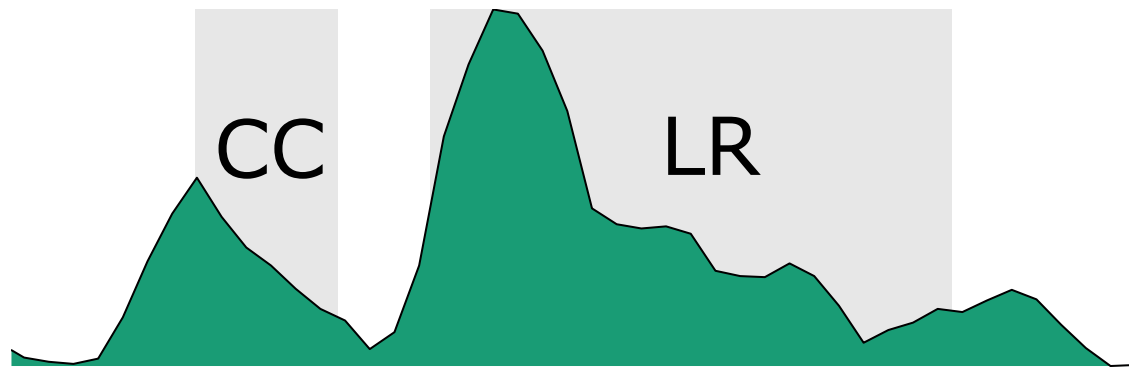

AFUN000288

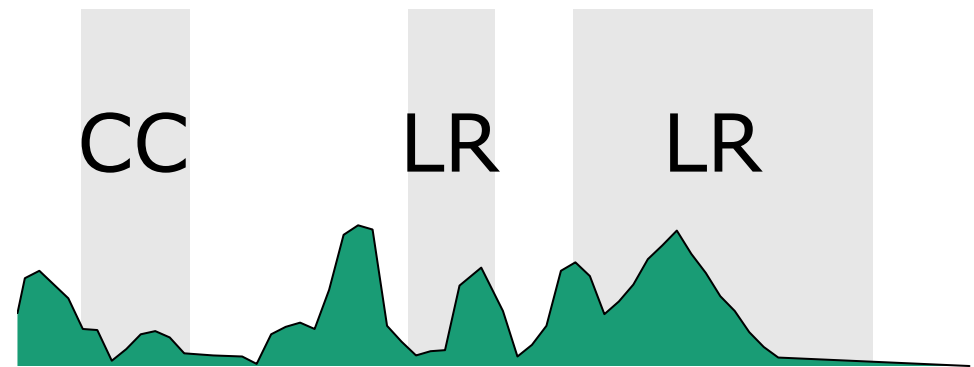

AFUN000279

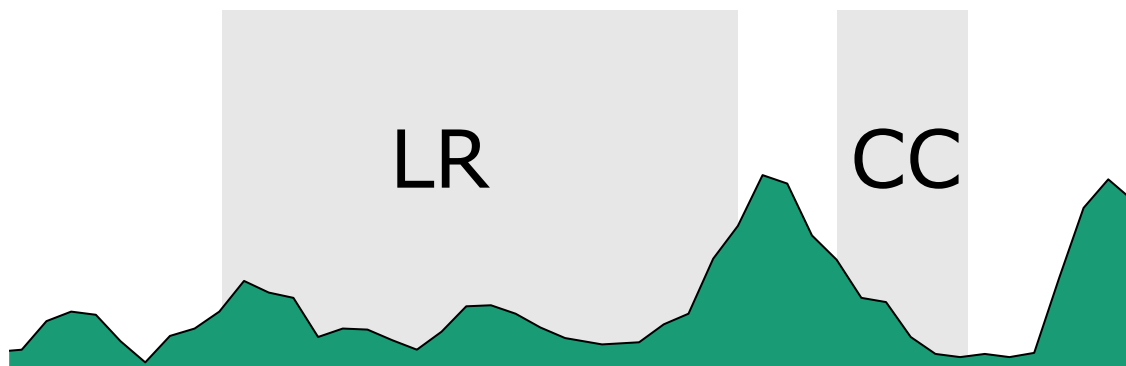

AFUN000597

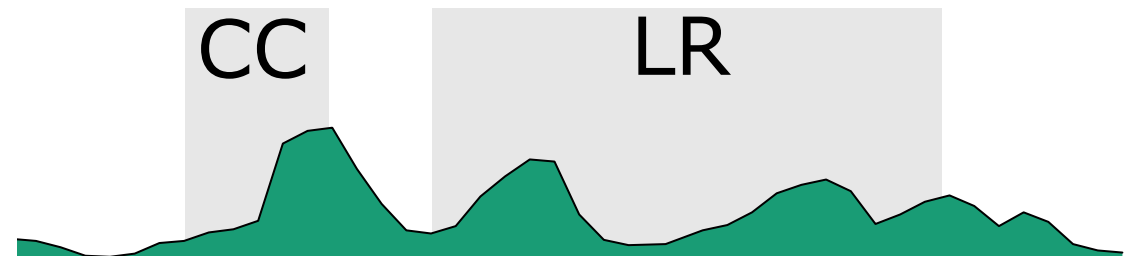

Supplement: s1 [file s1]

# APL1 - AFUN018743

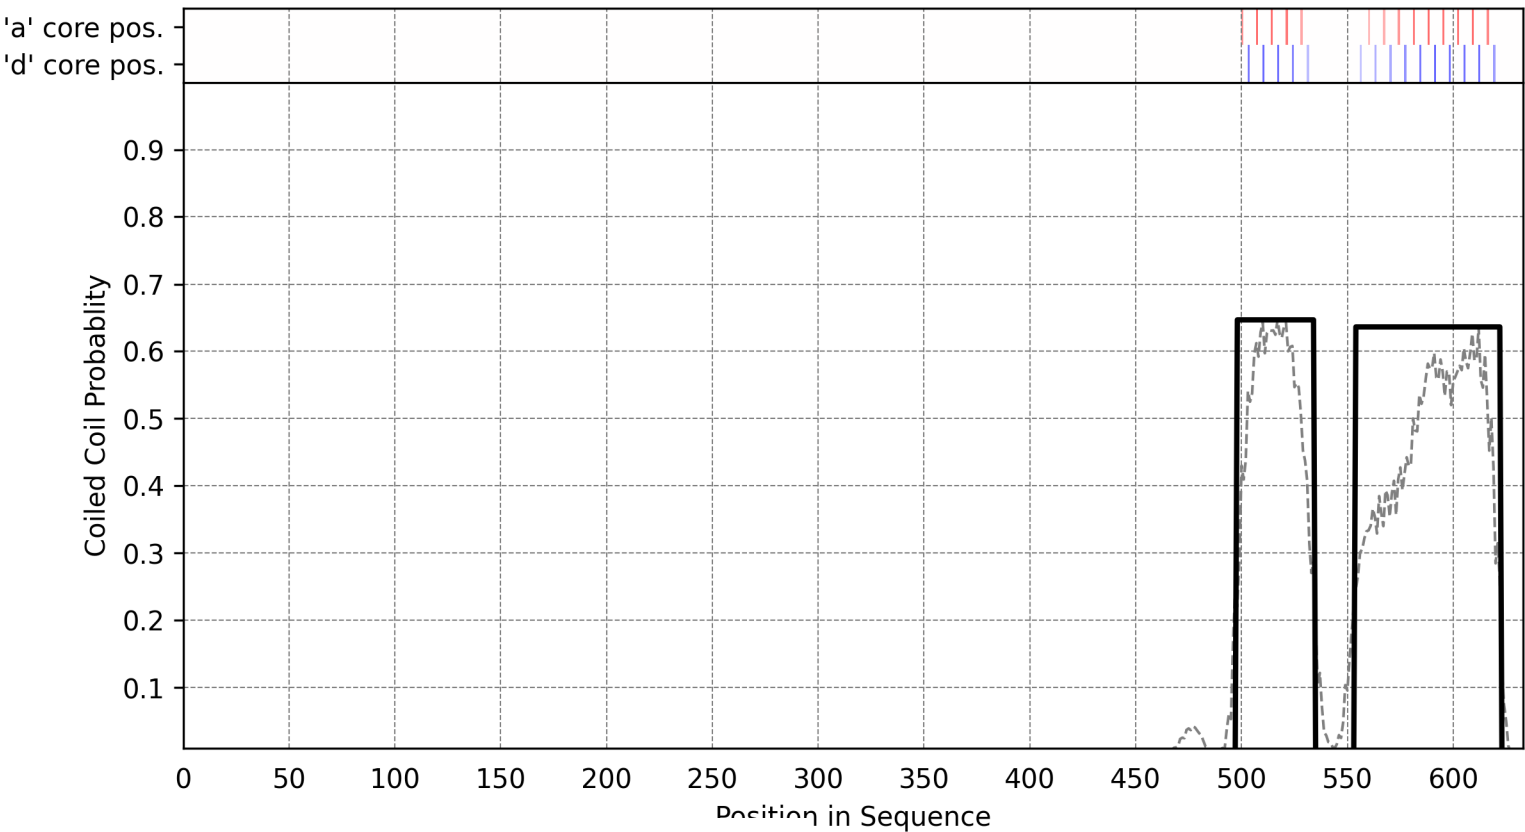

# AFUN000288

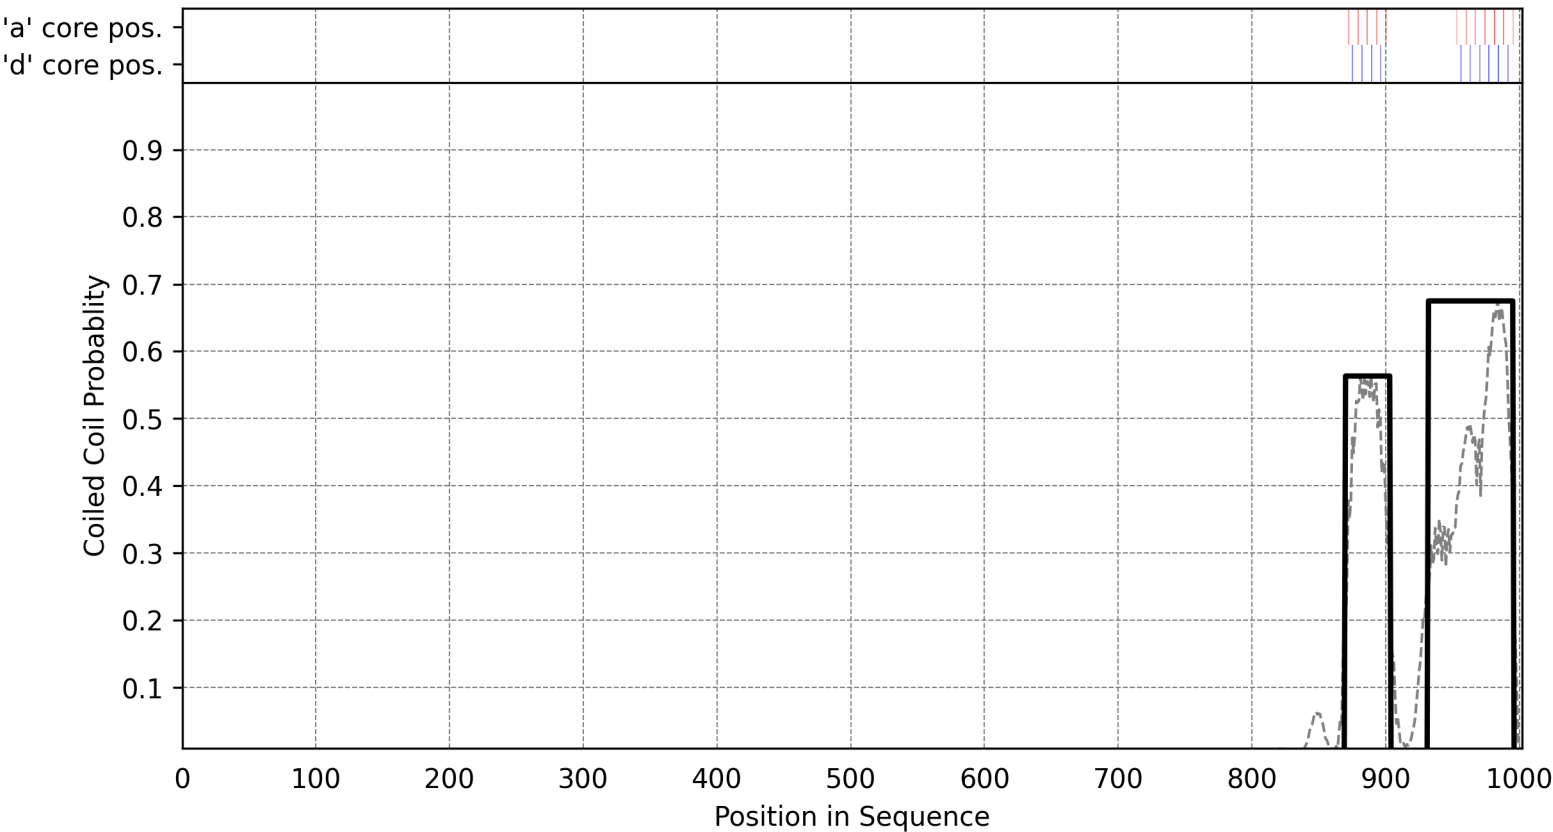

# AFUN000279

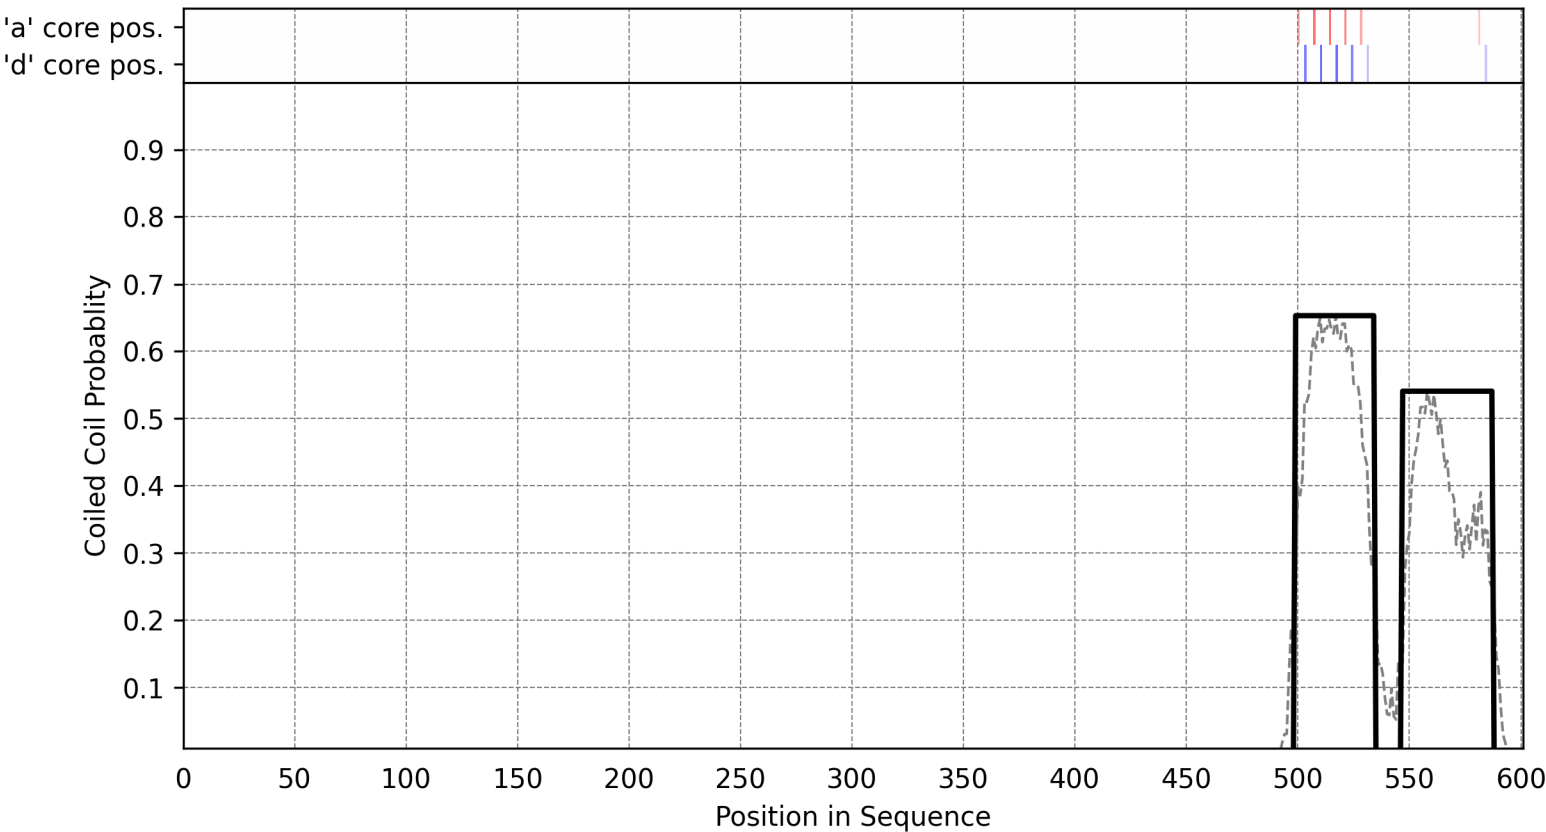

# AFUN000597

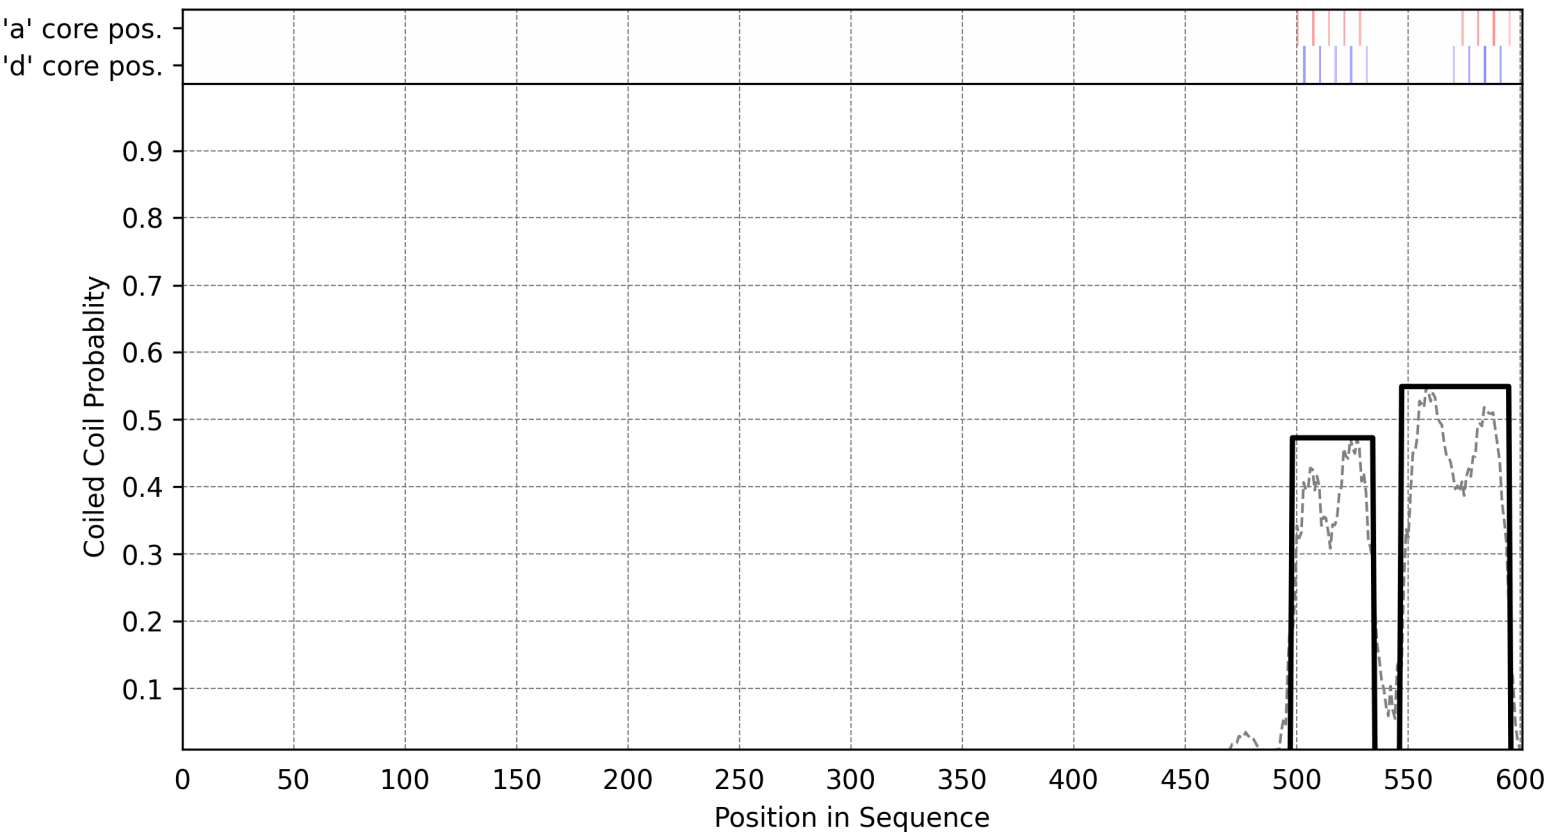

# AFUN018581

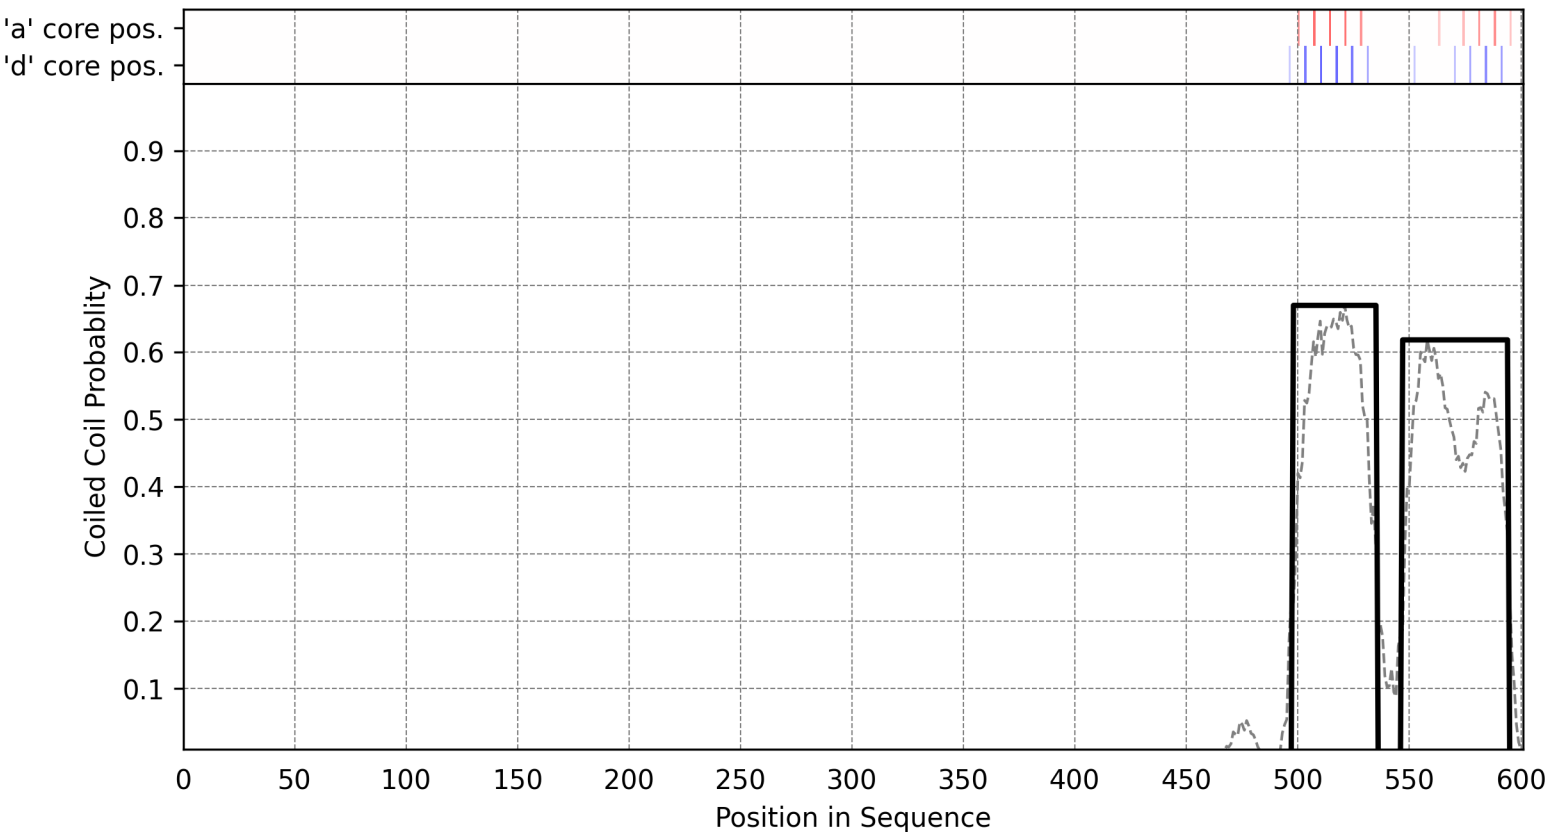

Supplement: s1 [file s1]

# APL1/AFUN018743 Benin

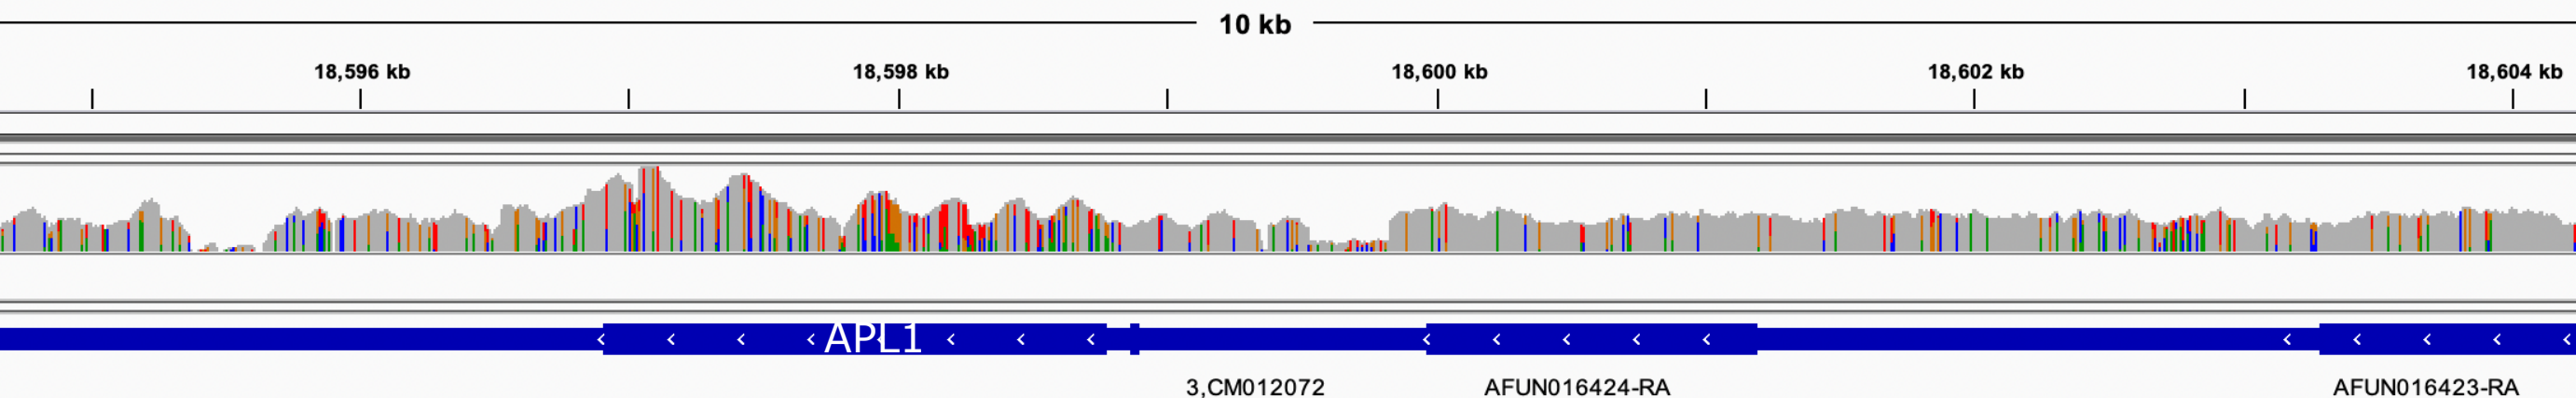

# CYP6AA1 - CYP6AA2 duplication Benin

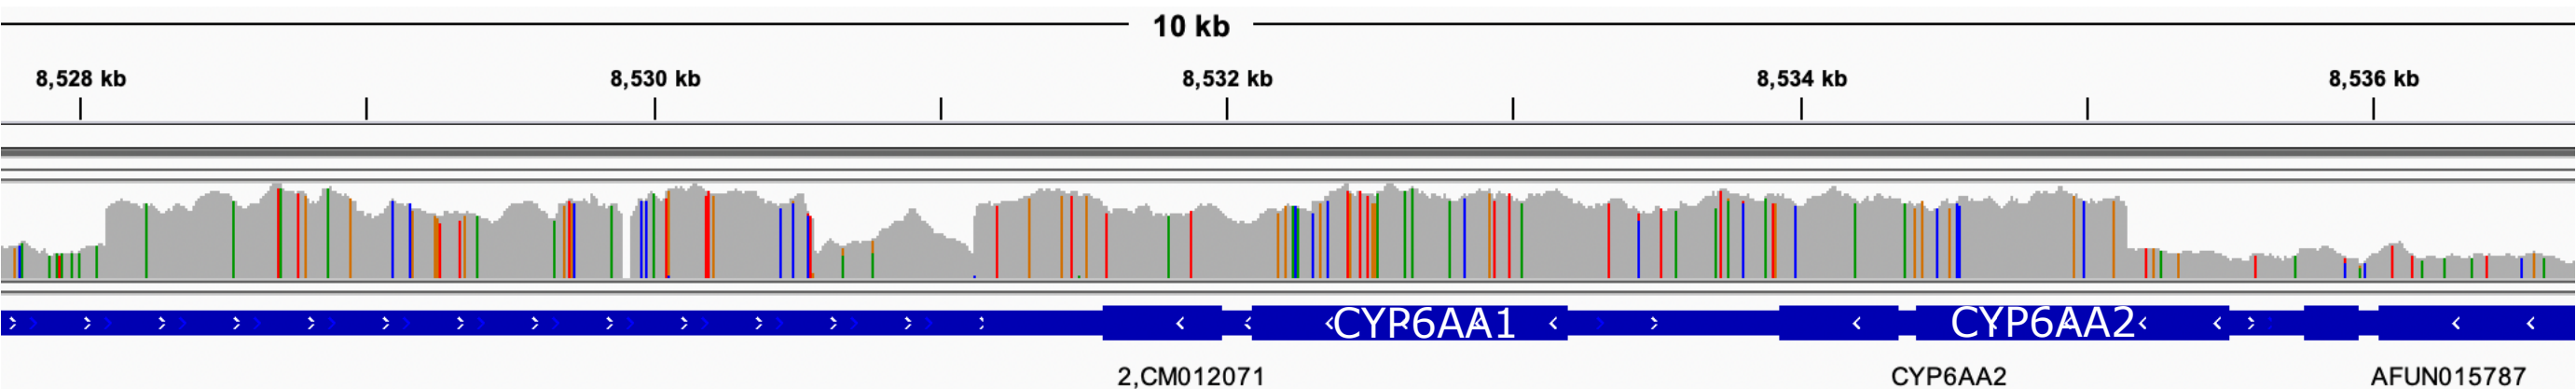

Supplement: s1 [file s1]
